# 1 **Risk factors for typhoid fever: A desk review**

2 Portia Boakye Okyere<sup>1</sup>, Sampson Twumasi-Ankrah<sup>2</sup>, Sam Newton<sup>1</sup>, Samuel Nkansah Darko<sup>3</sup>,  
3 Michael Owusu Ansah<sup>1</sup>, Eric Darko<sup>4</sup>, Francis Opoku Agyapong<sup>4</sup>, Hyon Jin Jeon<sup>5</sup>, Yaw Adu-  
4 Sarkodie<sup>4</sup>, Florian Marks<sup>5,#a,#b,#c</sup>, Ellis Owusu-Dabo<sup>1</sup>.

5 <sup>1</sup>School of Public Health, Kwame Nkrumah University of Science and Technology, Kumasi,  
6 Ghana.

7 <sup>2</sup>Department of Statistics and Actuarial Science, Kwame Nkrumah University of Science and  
8 Technology, Kumasi, Ghana.

9 <sup>3</sup>Department of Molecular Medicine, Kwame Nkrumah University of Science and Technology,  
10 Kumasi, Ghana.

11 <sup>4</sup>Department of Clinical Microbiology, Kwame Nkrumah University of Science and  
12 Technology, Kumasi, Ghana.

13 <sup>5</sup>International Vaccine Institute, SNU Research Park, 1 Gwanak-ro, Gwanak-gu, Seoul, 08826  
14 Korea, Republic of Korea

15 <sup>#a</sup>Department of Global Public Health, Karolinska Institutet, Stockholm, Sweden

16 <sup>#b</sup>Heidelberg Institute of Global Health, University of Heidelberg, Im Neuenheimer Feld 130/3,  
17 69120 Heidelberg, Germany

18 <sup>#c</sup>Madagascar Institute for Vaccine Research (MIVR), University of Antananarivo,  
19 Antananarivo, Madagascar

20 \*Portia Boakye Okyere

21 [portiaboky@gmail.com](mailto:portiaboky@gmail.com) (PBO)

## 22 **Abstract**

23 **Background and Aim:** Typhoid fever, a significant global health problem, demonstrates a

24 **NOTE:** This preprint reports new research that has not been certified by peer review and should not be used to guide clinical practice.  
multifaceted transmission pattern. Knowledge of these factors driving the transmission of the

25 infection is critical for developing effective control strategies and resource allocation. This  
26 comprehensive desk review aimed at synthesizing evidence from 1928 to 2023 on risk factors  
27 associated with typhoid fever transmission.

28 **Method:** We conducted article searches in PubMed, Scopus, Google Scholar, and Semantic  
29 Scholar, using keywords related to risk, contributors, determinants, causes etc. associated with  
30 typhoid fever. We utilized the Preferred Reporting Items for Systematic Reviews and Meta-  
31 Analysis (PRISMA) prepared search guidelines to support our search and triangulated the  
32 results.

33 **Results:** In all, we retrieved 1614 articles, of which 216 were reviewed. Of these articles  
34 reviewed, 106 provided data on typhoid fever risk factors. Unsurprisingly, of the total articles  
35 reviewed on risk factors, about 72% (76/106) originated from the Asian (48.1%, 51/106) and  
36 African (23.6%, 25/106) continents. A higher proportion, 47.2% (50/106) of the articles  
37 indicated risk factors related to socio-economic and housing transmission. Additional risk  
38 factors included foodborne transmissions (45.3%, 48/106), WASH: **W**aterborne transmissions  
39 (42.5%, 45/106), **S**anitation and **H**ygiene practices (32.1%, 34/106), travel-related risk (16.0%,  
40 17/106), antimicrobial agents (13.2%, 14/106), climate (13.2%, 14/106), environmental (8.5%,  
41 9/106), typhoid carriers (10.4%, 11/106), and host risk (5.7%, 6/106) factors to disease  
42 transmission.

43 **Conclusion:** These findings highlight the necessity for targeted and combined interventions  
44 including improved sanitation infrastructure, enhanced WASH practices and the use of  
45 vaccines in endemic areas. Implementing effective strategies informed by this review can aid  
46 clinicians, public health experts, and policymakers in efficiently mitigating the burden of  
47 typhoid fever.

48 **Keywords:** typhoid fever, risk factors, foodborne, waterborne, desk review.

## 49 **Introduction**

50 Typhoid fever (TF) is a potentially fatal febrile systemic disease caused by *Salmonella enterica*  
51 serotype Typhi (*S. Typhi*), a rod-shaped Gram-negative bacterium belonging to the  
52 *Enterobacteriaceae* family. *S. Typhi* exists exclusively in humans and causes illnesses that  
53 resemble many other febrile diseases<sup>1</sup>. A description of the infection was provided in Cunha<sup>2</sup>,  
54 clearly separating it from other febrile illnesses and associating its clinical manifestation with  
55 significant pathologic abnormalities in the spleen, mesenteric lymph nodes, and intestines.  
56 Nonetheless, the mainstay of diagnosis is a microbial culture, usually with blood or bone  
57 marrow samples. Although bone marrow culture is highly sensitive, it is both invasive and  
58 technically unfeasible in most settings. As a result, the disease is usually diagnosed with blood  
59 culture despite its limited sensitivity of about 40–80%, partly due to antibiotic exposures before  
60 the patient visits the health facility<sup>3</sup>.

61 The disease transmission is by the faecal-oral route and can take two main forms: direct  
62 transmission, where food and water in the immediate environment get contaminated through  
63 poor hygiene and sanitation practices, either by transient or chronic carriers; and indirect  
64 transmission, where the broader environment becomes contaminated when sewage pollutes  
65 water supplies, raw human faeces or untreated sewage are used as a crop fertilizer or piped  
66 water inadequately treated<sup>4</sup>.

67 Before 2000, the global burden of typhoid fever was estimated at 16 million illnesses and 600  
68 thousand deaths annually<sup>5</sup>. In 2000, about 21.7 million illnesses and 216,000 deaths occurred<sup>6</sup>.  
69 By 2010, annual estimates indicated around 26.9 million cases and 200,000 fatalities<sup>7</sup>. A  
70 current estimate in 2017 suggests that the number of typhoid cases per year has decreased to  
71 14.3 million, representing a 44.6% decrease in the global burden of typhoid fever<sup>8</sup>. Typhoid  
72 fever affects people of all ages, although children are more susceptible than other age groups<sup>9</sup>.

73 Typhoid fever can be prevented and controlled concurrently with vaccinations and  
74 advancements in food safety, water quality, hygiene and sanitation<sup>10</sup>. Three main generations  
75 of typhoid vaccines are presently approved for use by the World Health Organization (WHO):  
76 typhoid conjugate vaccine (TCV), live attenuated Ty21a, and the unconjugated Vi  
77 polysaccharide (ViPS) vaccines<sup>4</sup>. The WHO strongly recommends the use of TCV, for all ages  
78 due to its superior immunological properties, suitability for use in younger children, and  
79 predicted longer period of protection above 2 years, which was a major limitation for the use  
80 of the ViPS. However, to inform the choice of vaccination in a country, evidence on the scope  
81 of the problem as well as risk factors for the disease transmission in the area is required<sup>10</sup>.  
82 Despite notable progress in typhoid control, the disease remains a significant cause of  
83 morbidity and mortality to which billions of people worldwide are continuously exposed,  
84 particularly in Asia and sub-Saharan Africa.

85 The susceptibility of typhoid fever disease depends on a myriad of factors with distinct modes  
86 of transmission. In endemic countries, knowledge of typhoid fever risk factors is critical for  
87 developing effective control strategies and allocating resources. Several epidemiologic and  
88 modelled studies<sup>11-13</sup> have explored location- and time-specific risk factors for typhoid fever.  
89 In addition, various review studies have been undertaken to comprehensively understand and  
90 address the risk of typhoid across different transmission routes. For instance, Lee et al.<sup>14</sup>  
91 employed geospatial modelling to develop a typhoid risk index based on factors like water  
92 sources, toilet facilities, and population density, aiming to explain the geographical distribution  
93 of typhoid risk in impoverished countries. Likewise, Kim et al.<sup>15</sup> modelled the incidence of  
94 typhoid by investigating the relationship between observed incidence rates and various  
95 geospatial covariates, such as access to improved water and sanitation, the health and  
96 environmental conditions of the population, which may influence the transmission of *S. Typhi*.  
97 Brockett and colleagues<sup>16</sup> also systematically reviewed case-control studies to uncover

98 associations between Water, Sanitation, and Hygiene (WASH) practices, food exposures, and  
99 typhoid fever. Similarly, Mogasale et al.<sup>17</sup> performed a meta-analysis spanning 1990 to 2013  
100 to estimate the risk of typhoid associated with inadequate access to safe water. Meanwhile, Ma  
101 et al.<sup>18</sup> reviewed human genetic variants affecting susceptibility to enteric fever infection, and  
102 Levantesi et al.<sup>19</sup> assessed the contribution of natural freshwater and drinking water as routes  
103 of *Salmonella* contamination from 2000 to 2010. While these studies collectively provide  
104 valuable insights into various aspects of typhoid risk, a comprehensive review synthesizing  
105 these findings on typhoid risk factors is lacking. As a result, we aimed to conduct a desk review  
106 on risk factors for typhoid integrating the various transmission dynamics to inform targeted  
107 interventions for reducing typhoid incidence worldwide.

## 108 **Methods**

### 109 **Search strategy**

110 We searched PubMed, Scopus, Google Scholar, and Semantic Scholar for published articles  
111 on risk factors for typhoid fever. The search took place from 1<sup>st</sup> to 20<sup>th</sup> June 2023 with titles  
112 and abstracts from databases downloaded and saved. Each database was searched using the  
113 following terms and keywords: Risk factors, factors, contributors, determinants, causes,  
114 predictors, susceptibility factors, factors of exposures, predisposing factor, typhoid fever,  
115 typhoid, *Salmonella* typhoid, *Salmonella* Typhi, *S.* Typhi, typhoid disease, typhoidal  
116 *Salmonellosis*, and typhoidal *Salmonella* and without perforation, complication, virulence,  
117 severe, and non-typhoid. We placed no restrictions on the publication year but language was  
118 restricted to English. The protocol was prepared following the Preferred Reporting Items for  
119 Systematic Reviews and Meta-Analysis (PRISMA) guidelines and registered with the Open  
120 Science Framework (OSF) on 24 January 2024 with doi:

121 <https://doi.org/10.17605/OSF.IO/87JV9>. This study used published articles and as such,  
122 permission from the institutional review board was not required.

## 123 **Study screening and selection criteria**

124 We screened and selected typhoid fever studies reporting on risk factors. In such studies,  
125 typhoid fever infections or outbreaks were required to be caused by *S. Typhi* either by culturing  
126 bodily fluids or stool, Polymerase Chain Reaction (PCR), Widal or any other serological test.  
127 Furthermore, we selected epidemiological or modelled studies of any design. Additionally, we  
128 excluded studies on severe infections (complication and mortality), studies that classified  
129 typhoid fever based on clinical indicators (i.e., signs and symptoms) or with unclear diagnostic  
130 methods and studies with non-human participants including animals, water samples, and farm-  
131 produce. Finally, articles with full text not written in English or cannot be located were  
132 excluded. The details of our inclusion and exclusion criteria can be located in the screener  
133 instruction section in the [review protocol](#).

134 The titles and abstracts downloaded from each database were imported into EndNote X8.2 (Bld  
135 13302), merged into a single reference list and duplicates eliminated. The de-duplicated list  
136 was then uploaded to an online systematic review tool Rayyan (Qatar Computing Research  
137 Institute, Doha, Qatar) for titles and abstracts screening<sup>20</sup>. Thereafter, all included citations  
138 were exported into Microsoft Excel, Version 16.16.27 (201012) for full-text retrieval and  
139 screening. Each subsequent process, including title and abstract review, full-text review, and  
140 data extraction, was performed by one author (Portia Boakye Okyere: PBO) with supervision  
141 from co-authors (Ellis Owusu-Dabo: EOD, Sam Newton: SN and Sampson Twumasi-Ankrah:  
142 STA). PBO resolved discrepancies collectively with the co-authors. Data were then extracted  
143 into Microsoft Excel and uploaded to a shared Google Sheets spreadsheet (Google LLC,

144 Mountain View, CA, USA) (S2) and reported using Microsoft Word, Version 16.16.27  
145 (201012). Co-authors reviewed the final dataset for completeness and accuracy.

## 146 **Data extraction**

147 Electronic searches were performed using the internet to locate all eligible articles, and all  
148 relevant data relating to the research question were manually extracted into Microsoft Excel  
149 after reading the full text. The extracted data included specific risk factors for typhoid fever in  
150 all eligible articles. In addition, data on the route of transmission, sources of infection, year of  
151 publication, data collection period, town/district, country and continent of the study, study  
152 setting (outbreak or endemic), diagnostics method, study type, number of *S. Typhi* cases, total  
153 participants enrolled, ages of participants, study design, and citations were extracted (S2). We  
154 grouped the ages of participants into three based on inclusion age and age ranges/groups:  
155 “children” were  $\leq 15$  years, “adults” as  $> 15$  years, and “mixed ages” were both adults and  
156 children participants. Information on typhoid fever susceptibility was grouped according to  
157 their transmission routes; water- and food-borne transmissions, host risk factors, vaccination,  
158 travel-related risk, health education, occupational risk, population growth and overcrowding,  
159 sanitation and sewage systems, climate and meteorological factors, antimicrobial resistance,  
160 socio-economic and housing factors were extracted.

## 161 **Results**

162 Our search strategy initially identified 1614 articles. After removing 217 duplicates (Fig 1),  
163 1397 titles and abstracts remained for screening. Of these, 1181 were excluded, with majority  
164 (687 articles) not reporting typhoid fever risk factors as shown in Fig1. After a full-text review  
165 of 216 articles, 110 were further excluded, primarily due to the absence of clear risk factors in  
166 34 articles. Other reasons for exclusion include 25 duplicates of the same study published by  
167 different authors in different journals, 10 studies involving non-human subjects such as farm-

168 produced and water samples, 17 articles for non-English full-text and full-text not found, 6  
 169 articles not specifically related to *S. Typhi*, and 9 articles with missing or inappropriate  
 170 diagnosis based on recall TF episodes, unclear diagnosis and clinical indicators (signs and  
 171 symptoms). Furthermore, to avoid content duplication, 9 review articles were excluded.  
 172 Finally, a total of 106 published articles were included in this review, ranging from<sup>11-13,21-123</sup>  
 173 (S2).

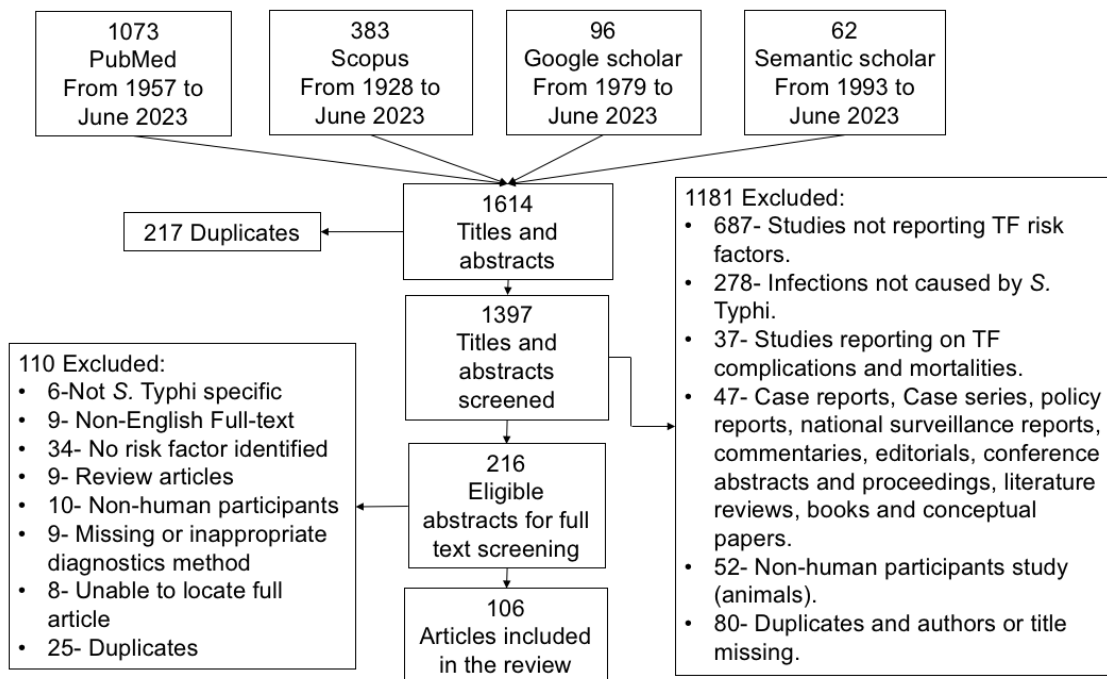

174  
 175 **Fig 1: Desk review flow diagram of search strategies and selection of articles for risk**  
 176 **factors for typhoid fever, before July 2023.**

177 **Study characteristics**

178 Among the 106 eligible articles (S2), data were collected from 1966 through 2020, spanning 6  
 179 continents: 23.6% (25/106) from Africa, 48.1% (51/106) from Asia, 0.9% (1/106) from South  
 180 America, 8.4% (10/106) from North America, 9.4% (10/106) from Europe, and 6.6% (7/106)  
 181 from Australia. Two articles (1.9%, 2/106) collected data from mixed continents, while one  
 182 article (0.9%, 1/106) relied on the GeoSentinel Surveillance Network database, lacking specific  
 183 location details (S1 Table 1). Regarding transmission routes, over 42.0% (45/106) of the  
 184 articles examined typhoid fever risk factors suggesting waterborne transmission, while 45.3%



185 (48/106) focused on foodborne transmission. Socio-economic and housing factors were  
186 covered in most (47.2%, 50/106) of the publications, hygiene and sanitation in 32.1% (34/106)  
187 articles, and all other TF risk factors in 74.6% (79/106) articles, (S1 Table 2). Across 101  
188 papers, a total of 246,888 typhoid fever cases were reported, with a median (IQR) of 109 (50,  
189 260). The diagnosis was confirmed predominantly through culture in 86.8% (92/106) of the  
190 articles, with 19.8% (21/106) articles using Widal and other serological tests and 5.7% (6/106)  
191 using PCR and other sequencing techniques. Age distribution data were available in 100  
192 articles, with the majority 82% (82/100) including participants of mixed ages, while over 14%  
193 (14/100) focused on those  $\leq 15$  years and 4% (4/100) on those  $> 15$  years, (S1 Table 1).

## 194 **Discussion**

195 Our desk review has allowed us to synthesize the evidence on typhoid fever risk factors from  
196 1928 to 2023. We have identified specific risk factors suggesting waterborne and foodborne  
197 transmissions, socio-demographic, economic and housing factors, hygiene and sanitation, host  
198 risk factors, antimicrobial agents and typhoid carriers that could influence typhoid fever  
199 transmission. This is potentially important information for clinicians, public health experts and  
200 policymakers because effective control strategies can be developed as well as allocating limited  
201 resources mostly in endemic countries.

202 Approximately 72% of the reviewed articles collected data from Asia and Africa continents,  
203 where most of the developing countries are located. This is in accordance with the global  
204 burden of typhoid fever estimation, which shows that Asian and African countries bear the  
205 greatest burden<sup>124</sup>. The low number of articles in Europe, Northern America and Australia can  
206 be attributed to the introduction of control programs such as the treatment of municipal water,  
207 pasteurization of dairy products, and exclusion of human faeces from food production<sup>1,125</sup>.  
208 Likewise, the lack of studies from Southern America can be attributed to the decline in typhoid  
209 burden given the economic transition with improved water and sanitation in the area<sup>1</sup>.

## 210 **Waterborne transmission**

211 Water sources greatly impact the spread of typhoid fever, with protected wells and piped water  
 212 classified as safe, while rivers, streams and other unprotected sources are deemed unsafe<sup>126</sup>.  
 213 Our review identified specific risk factors (Table 1) associated with typhoid fever and water  
 214 sources, including having multiple drinking water sources<sup>66</sup>, use of non-municipal water  
 215 sources for various purposes<sup>27,66,105</sup>, and main water sources with foul smell<sup>35</sup>. Regarding  
 216 multiple water sources, households face potable water access challenges like limited hours,  
 217 high tariffs, low pressure, and long distances from water sources. These challenges impede  
 218 their ability to meet daily needs. Consequently, some households close to open-dug wells,  
 219 rivers or streams may use these sources for bathing, cooking, or drinking<sup>113</sup>. Although  
 220 convenient, these water sources often lack chlorination and may be contaminated with faecal  
 221 matter, posing a risk for typhoid fever transmission. This risk is increased by foul-smelling  
 222 water points that could contain pathogens such as *S. Typhi*<sup>35</sup>.

223 **Table 1. Risk factors suggesting waterborne transmission of typhoid fever**

| Common factors            | Specific risk factors                                                                                                                                                                                                                                                                                                                                                                                                                                                                                                     |
|---------------------------|---------------------------------------------------------------------------------------------------------------------------------------------------------------------------------------------------------------------------------------------------------------------------------------------------------------------------------------------------------------------------------------------------------------------------------------------------------------------------------------------------------------------------|
| Water sources             | Household sources of drinking water <sup>21,56</sup> , having multiple drinking water sources <sup>66</sup> , using water from other sources than the municipal water networks for bathing, brushing teeth or drinking <sup>110</sup> , primary water sources with unpleasant smell <sup>35</sup> , obtaining water from an outside tap <sup>44</sup> , unsafe water source <sup>51,113</sup> , obtaining water from municipal pipe for drinking <sup>105</sup> , obtaining water from a river/stream <sup>11,113</sup> . |
| Water supply              | Water supplied by an outdated gravity-fed network <sup>51</sup> , Intermittent water availability <sup>11</sup> , inadequate safe water supply <sup>13</sup> , defective water systems <sup>111</sup> , household water supply from public wells and boreholes or merchants <sup>96</sup> , water from a community <sup>32</sup> , water from government overhead tanks <sup>41</sup> .                                                                                                                                   |
| Contaminated/unsafe water | Drinking unsafe/contaminated water <sup>24,31,61,77,93</sup> , using substandard water <sup>81</sup> , <i>E. coli</i> in stored drinking water <sup>77</sup> , water sold in small plastic bags <sup>78</sup> , use of ice cubes from a street vendor <sup>27,121</sup> .                                                                                                                                                                                                                                                 |
| Untreated water           | Drinking water from a well <sup>94</sup> , untreated household drinking water <sup>35,44-46,68,118</sup> , use of untreated public water after rains <sup>30</sup> , drinking water from untreated open sources <sup>11,25,87</sup> , drinking water at the work site <sup>32</sup> , use of bore water <sup>105</sup> , Accidental ingestion of contaminated river water during swimming and/or bathing <sup>24</sup> , cooking and cleaning with river water or an open dug well <sup>66</sup> .                        |

|               |                                                                                                                                                                                                                                                           |
|---------------|-----------------------------------------------------------------------------------------------------------------------------------------------------------------------------------------------------------------------------------------------------------|
| Water storage | Storing water in plastic containers without a lid <sup>96</sup> , Not storing water for drinking in a narrow-mouthed container <sup>36</sup> , not using tipped containers to draw water <sup>36</sup> , water sold in small plastic bags <sup>78</sup> . |
|---------------|-----------------------------------------------------------------------------------------------------------------------------------------------------------------------------------------------------------------------------------------------------------|

224

225 Defects in water supply systems can also facilitate the transmission of typhoid fever. Our study  
226 further discovered a typhoid fever outbreak associated with a gravity-fed network<sup>51</sup>, indicating  
227 a probable spread through an outdated mains system. Due to low water pressure, insufficient  
228 chlorination and faecal infiltration were implicated<sup>11</sup>.

229 Intermittent piped water supply, common in developing countries, poses health risks by causing  
230 contamination in non-pressurized pipes and creating negative pressure situations that enable  
231 pathogens like *S. Typhi* to enter the system, thereby increasing the risk of typhoid  
232 transmission<sup>11,127</sup>. Frequent interruptions in water supply also raise awareness of water storage  
233 practices, potentially increasing recontamination risks during storage and prompting  
234 households to turn to unsafe alternative water sources<sup>11,27</sup>. Households relying on water  
235 supplied from government overhead tanks<sup>41</sup> and community or public taps<sup>32,113</sup> may not always  
236 be microbiologically safe due to environmental conditions supporting contamination. Water  
237 contamination from various sources, including industrial activities, sewage discharges,  
238 agricultural practices, and urban runoff, poses other risks for typhoid transmission, as  
239 demonstrated by studies attributed to drinking contaminated water from unprotected  
240 groundwater sources and communal water sources exposed to human and animal waste<sup>24,78</sup>.

241 The presences of *Escherichia coli* (*E. coli*) in drinking water is commonly regarded as an  
242 indicator of fecal contamination and a potential risk factor for typhoid fever due to the possible  
243 presence of enteric pathogens<sup>77</sup>. However, the relationship between *E. coli* and typhoid fever  
244 risk remains inconclusive. For instance, Karkey et al.<sup>128</sup> observed a link between concentrations  
245 of *E. coli* in drinking water and the presence of *S. Typhi* nucleic acids. In contrast, Luby and  
246 colleagues<sup>32</sup> found no significant difference in the levels of *E. coli* in household water samples  
247 between individuals with typhoid and control groups, challenging the consistency of this

248 connection. Furthermore, water storage practices significantly impact typhoid transmission,  
249 with studies indicating a decline in microbiological water quality post-collection<sup>96</sup>. Increased  
250 contamination risk is associated with the type of vessel used to store or draw drinking water,  
251 with wide-mouthed containers posing higher infection risks compared to tipped containers due  
252 to their large open surface area and increased faecal contamination opportunities<sup>36,96</sup>. Untreated  
253 water, both inside and outside homes, poses significant risks for typhoid fever  
254 transmission<sup>25,30,46,87</sup>. Despite improvements in municipal water system filtration and  
255 chlorination, contamination with *S. Typhi* from wastewater cross-contamination remains  
256 possible<sup>44</sup>. Household water disinfection may be necessary to enhance water quality<sup>35</sup>.  
257 However, some households opt out of water treatment due to perceived safety<sup>96</sup>. Consuming  
258 water directly from pipes or other protected sources, even if contaminated, may contain  
259 insufficient bacteria to cause typhoid fever. Conversely, untreated water from unprotected  
260 sources may carry high *S. Typhi* levels, enough to cause clinical disease<sup>24,32,45</sup>. All risk factors  
261 discussed above are listed in Table 1.

## 262 **Foodborne transmission**

263 Food serves as a highly efficient medium for the growth of *S. Typhi* compared to water<sup>32</sup>. This  
264 study revealed specific risk factors indicating potential foodborne transmission of typhoid fever  
265 (Table 2) with street stalls (restaurants) emerged as a major factor. Street food stalls are  
266 typically small, outdoor seating without refrigerators, easy access to potable water or adequate  
267 facilities for washing food and utensils<sup>27,32,43</sup>. Therefore, persons who frequently consume food  
268 from such establishments are at increased risk of developing typhoid fever<sup>27</sup>, possibly due to  
269 the use of untreated or tap water stored or served in contaminated containers for food  
270 preparation and drinking purposes<sup>43</sup>. Additionally, poor hygiene practices among street food  
271 vendors, including irregular handwashing<sup>120</sup>, and the potential exposure to carriers of *S. Typhi*  
272 contribute to the risk of infection<sup>129</sup>. Food preparers and handlers in the street or market eateries

273 may lack knowledge of safe food production precautions to avert *S. Typhi* infections. They  
274 have no idea that they could be *S. Typhi* carriers because they did not apply for a license or  
275 registration from the food authorities, as a result, they are neither educated nor regularly  
276 inspected<sup>43,106</sup>. Consequently, they may share food and alcoholic beverages using poorly  
277 cleaned cups and other utensils between multiple clients<sup>95,118</sup>. Furthermore, Consumption of  
278 frozen foods such as ice cream<sup>12,28,47</sup>, shakes made from tropical fruits<sup>82</sup> and iced drinks<sup>27</sup> have  
279 also been linked to typhoid fever. Street vendors may purchase ice in large blocks made of  
280 unclean water from ice factories that produce ice for fisheries, not for human consumption,  
281 however, this ice is served in drinks for clients. Research has shown that *S. Typhi* can survive  
282 in ice for extended periods, thus the ice may potentially harbour the bacteria<sup>27,43,120</sup>. Likewise,  
283 the iced drink might be contaminated by street vendors who may be *S. Typhi* carriers in the  
284 distribution chain<sup>27</sup>. In contrast, dining at tea houses appears to decrease the risk of typhoid  
285 fever, as customers are primarily served boiled water and tea, limiting exposure to *S. Typhi*<sup>45</sup>.  
286 Consumption of uncooked or raw foods like onions, milk, meat, shellfish, papaya, cabbage and  
287 other traditional raw foods, poses a significant risk for typhoid fever<sup>29,35,36,56,116</sup>. Failure to wash  
288 fruits and vegetables before consumption also increases the risk of infection due to surface  
289 contamination<sup>11,36,45</sup>. Cross-contamination during meat handling may occur when the same  
290 knives and cutting boards for infected and uninfected meat are used in butcheries and  
291 restaurants. Furthermore, using contaminated water to wash carcasses and food contact  
292 surfaces might expose meat surfaces to *S. Typhi*<sup>56</sup>. Moreover, inadequate hygiene practices  
293 during milk processing may contribute to the contamination of dairy products, including butter,  
294 yoghurt, and homemade cheese<sup>12,36,56</sup>. While dairy animals do not harbour *S. Typhi*<sup>130</sup>,  
295 contaminated dairy products can serve as effective growth media for the pathogen<sup>56</sup>.

296 **Table 2. Risk factors suggesting foodborne transmission of typhoid fever**

| Common factors | Specific risk factors |
|----------------|-----------------------|
|----------------|-----------------------|

|                          |                  |                                                                                                                                                                                                                                                                                                                                                                                                                                                                                                                                                                                                                           |
|--------------------------|------------------|---------------------------------------------------------------------------------------------------------------------------------------------------------------------------------------------------------------------------------------------------------------------------------------------------------------------------------------------------------------------------------------------------------------------------------------------------------------------------------------------------------------------------------------------------------------------------------------------------------------------------|
| Street food              | stall/restaurant | Eating out from commercial food stalls/restaurants/mobile food vendors in the street/outside home <sup>23,32,43,89,99,120</sup> , eating outdoors at least once a week <sup>27,28,115</sup> , eating food from a roadside cabin during the summer <sup>32</sup> , mothers eating food from street vendors <sup>68</sup> , eating cold beverages outside home <sup>43</sup> , not dining at a tea-house <sup>45</sup> , consuming French fries with sauce and poppadum from street vendors <sup>105</sup> , eating commercially available foods or drinks <sup>118</sup> , eating food at community market <sup>95</sup> . |
| Poor food hygiene        |                  | Eating unwashed farm produced <sup>11</sup> , unwashed guavas <sup>36</sup> , not washing vegetables before eating <sup>45</sup> .                                                                                                                                                                                                                                                                                                                                                                                                                                                                                        |
| Food handlers            |                  | Consuming food items from vendors <sup>106,120</sup> , male food handlers <sup>38</sup> , consuming food with the mother's or caregiver's assistance <sup>28</sup> , drinking orange juice with hand contact <sup>48</sup> , poor/unhygienic food handling practices/procedures <sup>13,98</sup> , eating food prepared at home <sup>95</sup> .                                                                                                                                                                                                                                                                           |
| Salads/contaminated food | other            | Eating contaminated foods <sup>61</sup> , including cucumber salad <sup>92</sup> , consumption of potato salad <sup>112</sup> , lettuce salad <sup>29</sup> , and raw salads (onion, cucumber, tomato) <sup>101</sup> .                                                                                                                                                                                                                                                                                                                                                                                                   |
| Uncooked/raw food        |                  | Eating raw traditional foods like cig kofte <sup>29</sup> , raw onions and cabbage <sup>36</sup> , raw milk and meat <sup>56</sup> , uncooked shellfish <sup>116</sup> , intake of papaya <sup>35</sup> , unwashed guava <sup>36</sup>                                                                                                                                                                                                                                                                                                                                                                                    |
| Frozen food              |                  | Eating of ice-cream <sup>28,32,47</sup> , ingesting ice cubes in beverages <sup>27</sup> , consumption of frozen tropical fruit (mamey) shakes <sup>82</sup> , fresh ice cream during the hot season <sup>12</sup> .                                                                                                                                                                                                                                                                                                                                                                                                      |
| Milk products            |                  | Eating butter and yoghurt <sup>36</sup> , fresh yoghurt made from cow and sheep in the summer <sup>12</sup> and homemade cheese <sup>12</sup> .                                                                                                                                                                                                                                                                                                                                                                                                                                                                           |
| Local/traditional food   |                  | Consuming locally-made beverages <sup>78</sup> , eating locally prepared popsicles <sup>101</sup> , consuming locally prepared flavoured beverages <sup>101</sup> .                                                                                                                                                                                                                                                                                                                                                                                                                                                       |
| Others                   |                  | Eating food brought by relatives from endemic areas <sup>89</sup> , sharing food from the same plate <sup>121</sup> , sharing food plates <sup>51</sup> .                                                                                                                                                                                                                                                                                                                                                                                                                                                                 |

## 297 **Socio-economic and housing factors**

298 Our study findings presented in Table 3 showed socio-economic and housing factors as risks  
 299 for typhoid fever transmission. Firstly, demographic characteristics including age and sex  
 300 emerged as a major determinant of susceptibility to typhoid fever in this category. Gender  
 301 dynamics introduce complexities, with conflicting findings regarding its association with  
 302 typhoid fever risk. While a study suggests that males face greater exposure due to occupational,  
 303 dietary factors or a lack of immunity<sup>80</sup>, others propose that females, influenced by their  
 304 physiological status, hormonal imbalance and gender-specific activities, are more  
 305 susceptible<sup>118,119</sup>. Nonetheless, a study by Rasul et al.<sup>131</sup> maintains that typhoid fever incidence  
 306 is independent of gender, affecting both males and females across all age groups equally. Age

307 serves as a significant factor in typhoid transmission, with both young children and older adults  
 308 identified as vulnerable groups<sup>119,132</sup>. Young children, characterized by their underdeveloped  
 309 immune systems<sup>31,40,85</sup> and limited understanding of disease transmission<sup>56,85</sup>, face heightened  
 310 risks of infection. Whereas younger adults are predisposed to infections due to their  
 311 adventurous lifestyle or unsanitary activities, such as eating junk food, and an increased  
 312 number of social gatherings<sup>22,40,56</sup>, older adults are more likely to be *S. Typhi* resistant due to  
 313 continual immune-boosting<sup>132</sup>. Conversely, older adults may experience susceptibility as they  
 314 are more exposed to occupational hazards of farming-related water contact activities<sup>56,66</sup>,  
 315 rearing chicken or goats<sup>66</sup>, mishandling of *S. Typhi* samples by clinical staff<sup>70,89</sup>, and being a  
 316 sewage worker<sup>89</sup>. With regards to rearing chicken, as *S. Typhi* is a human-adapted pathogen, it  
 317 is likely that animal keeping is a confounder and may be associated with poor unhygienic  
 318 conditions in the home<sup>90</sup>.

319 **Table 3. Socio-economic and housing factors indicating typhoid fever risk.**

| Common factors                     | Specific risk factors                                                                                                                                                                                                                                                                                                                                                                     |
|------------------------------------|-------------------------------------------------------------------------------------------------------------------------------------------------------------------------------------------------------------------------------------------------------------------------------------------------------------------------------------------------------------------------------------------|
| Demographic background             | Age <sup>22,56,85</sup> , Older age <sup>37,84</sup> , younger age <sup>31,40,57,80,106,107</sup> , sex of the individual <sup>100</sup> , being female <sup>106,119</sup> or male <sup>85,99</sup> , presence of preschool children in the household <sup>101</sup> , young adult <sup>119</sup> , demographic status <sup>54</sup>                                                      |
| Socio-economic status              | Poor/low socio-economic status <sup>22,54,74,81,102</sup> , attending a gathering <sup>94</sup> , per capita disposable income of all residents, and per capita GDP <sup>100</sup> , unemployment or part-time work <sup>27</sup> , being part of a nuclear family <sup>47</sup> , wealth index <sup>88</sup> , being a student <sup>45</sup> , attending school or daycare <sup>66</sup> |
| Education level                    | No/low educational level <sup>25,46,118</sup> , educational level <sup>56</sup> , years of schooling <sup>88</sup> , students in conventional institutions of higher learning <sup>100</sup> , illiteracy rate <sup>47,102,103</sup>                                                                                                                                                      |
| Occupational risk                  | Mishandling of <i>S. Typhi</i> samples by clinical microbiology laboratory staff <sup>70</sup> , medical, laboratory personnel and sewage workers occupationally exposed to <i>Salmonella</i> bacteria <sup>89</sup> , household member growing crops <sup>66</sup> , farmers <sup>85</sup> , rearing chicken or goats <sup>90</sup> , job-related cause <sup>61</sup>                    |
| Population growth and overcrowding | Rising/bigger household size <sup>26,102</sup> , living in a crowded household <sup>29</sup> , crowding poor living conditions <sup>61</sup> , Increased population density <sup>31,111</sup>                                                                                                                                                                                             |
| housing system/ condition          | Poor housing condition <sup>77</sup>                                                                                                                                                                                                                                                                                                                                                      |

320

321 Our investigation further revealed that socio-economic status correlates with an increased  
322 likelihood of *S. Typhi* infection<sup>94</sup>. Studies suggest that typhoid fever is more common in low-  
323 income countries and is connected to poor public health and low socio-economic indicators<sup>22,81</sup>.  
324 However, a contrasting study<sup>88</sup> identified a protective effect of the wealth index on typhoid  
325 fever, suggesting that residing in affluent districts within low- or middle-income countries  
326 could significantly mitigate the risk. Moreover, the impact of per capita GDP and disposable  
327 income on typhoid fever transmission was identified<sup>100</sup>, highlighting the association between  
328 economic status and disease susceptibility. Hence, the likelihood of contracting typhoid fever  
329 may hinge upon various economic factors such as the economic foundation of the residency  
330 area, individual economic status, access to healthcare, and advancements in disease diagnosis,  
331 ultimately contributing to an increase in the detection rate of typhoid fever. Notably,  
332 insufficient case detection is observed when febrile patients fail to seek medical attention or  
333 undergo blood testing, emphasizing the critical role of consultation rates and diagnostic  
334 measures in controlling the spread of typhoid fever<sup>100</sup>.

335 In the context of education, our research highlights the lack of certificate education, indicating  
336 individuals who have never attended school, as a significant risk factor associated with the  
337 perception of typhoid fever. This suggests that a low level of education correlates with limited  
338 awareness of how the disease spreads<sup>100,118</sup>. Studies<sup>88,103</sup> emphasize that the number of years  
339 spent in formal education directly influences one's understanding of typhoid fever  
340 transmission. Specifically, uneducated people, exhibit a higher likelihood of contracting  
341 typhoid fever compared to those with formal education<sup>102</sup>. However, it is noteworthy that being  
342 a student<sup>45</sup> and attending school (daycare)<sup>66</sup> are independent risk factors for typhoid fever.  
343 Certain exposures within educational environments may increase the risk of infection among  
344 students. More importantly, health education, which encompasses awareness of practices such  
345 as handwashing with soap as recommended by WHO, is deemed essential. This form of



346 education is considered a state of mind and may not necessarily be acquired solely through  
347 formal education systems. Table 5 illustrates specific risks associated with health education,  
348 such as a lack of knowledge regarding contact with typhoid fever<sup>26,95</sup>. Individuals lacking this  
349 knowledge are less likely to take preventive measures, increasing their susceptibility to  
350 infection.

351 **Table 5: Other risk factors for typhoid fever**

| Common factors                   | Specific risk factors                                                                                                                                                                                                                                                                                                                                                                                                                                                                                                                                                                                                                                                                           |
|----------------------------------|-------------------------------------------------------------------------------------------------------------------------------------------------------------------------------------------------------------------------------------------------------------------------------------------------------------------------------------------------------------------------------------------------------------------------------------------------------------------------------------------------------------------------------------------------------------------------------------------------------------------------------------------------------------------------------------------------|
| Antimicrobial Agent              | Frequent/history/ of antimicrobial usage <sup>32,45,53,60,61,74,79,99</sup> , Chloramphenicol-resistant <i>S. Typhi</i> strain <sup>42,77</sup> , ceftriaxone-resistant <i>S. Typhi</i> strain <sup>117</sup> , MDR or XDR <i>S. Typhi</i> strains <sup>119</sup> , circulation of virulent <i>S. Typhi</i> strain (H58-lineage) <sup>58,101</sup> .                                                                                                                                                                                                                                                                                                                                            |
| Host risk factors                | Polymorphism in intronic VNTR of IL-4 <sup>33</sup> , presence of serum anti- <i>H. pylori</i> IgG antibodies <sup>47,107</sup> , history of chronic underlying disease <sup>67</sup> , HIV infections <sup>69</sup> , Haplotype of TNF locus from SNPs <sup>122</sup>                                                                                                                                                                                                                                                                                                                                                                                                                          |
| Typhoid carrier/s                | Recent/close contact with confirmed/active typhoid fever patient <sup>30,46,61,86,99,103</sup> , hospitalization of household member with febrile illness <sup>66</sup> , history of typhoid fever infections <sup>67</sup> , having typhoid carrier at home <sup>63</sup> , recent typhoid fever case in the household <sup>106</sup> , having a housekeeper (a boy or girl) <sup>118</sup> .                                                                                                                                                                                                                                                                                                  |
| Vaccination                      | No/lack of vaccination <sup>61,73,104</sup> , vaccine hesitancy <sup>118</sup> , vaccine ineffectiveness <sup>92</sup> , poor vaccination coverage <sup>101</sup>                                                                                                                                                                                                                                                                                                                                                                                                                                                                                                                               |
| Health education                 | Lack of knowledge regarding typhoid fever contact <sup>26</sup> , poor awareness of typhoid fever disease <sup>95</sup> .                                                                                                                                                                                                                                                                                                                                                                                                                                                                                                                                                                       |
| Travel-related risk              | Longer duration of stay in the endemic area <sup>37</sup> , returning/visiting endemic countries <sup>74,84,114</sup> , visiting friends and relatives in endemic areas <sup>37,71</sup> , travel destination <sup>62</sup> , travel outside the United States or Sweden (international travel) <sup>39,57,91</sup> , Asian travellers <sup>50</sup> , children visiting friends and relatives in endemic places (particularly South Asia) <sup>59,97</sup> , recent travel to endemic areas <sup>83,123</sup> , transient male workers <sup>80</sup> , living in a metropolitan area <sup>84</sup> , urbanization <sup>88</sup> , number of foreign tourists received (tourism) <sup>100</sup> |
| Environmental conditions/factors | Living in geographically lower elevation areas <sup>40</sup> , neighbours to a typhoid fever case <sup>52</sup> , potentially floodable areas <sup>55</sup> , proximity to major rivers and creeks <sup>55</sup> , housing (external condition) <sup>77</sup> , a lack of agricultural land <sup>113</sup> , hydrological catchment areas <sup>119</sup> , residing closer to waterbodies, residing near typhoid study treatment centres <sup>102</sup> , Anthropogenic alteration of land cover and hydrology <sup>76</sup> , Environmental factors <sup>54</sup>                                                                                                                              |
| Climate/ Meteorological factors  | Seasonal variation or fluctuations <sup>22,80,100,108</sup> , high temperatures during summer <sup>101</sup> , rainfall <sup>55,113</sup> , temperature and precipitation <sup>109,113</sup> , high vapour pressure <sup>113</sup> , rainy and harmattan seasons <sup>34</sup> , extreme weather conditions <sup>75</sup> , higher/hot temperatures <sup>64,84</sup> , flooding <sup>85</sup> , wind speed <sup>88</sup>                                                                                                                                                                                                                                                                        |

352

353 Another significant factor for typhoid transmission (Table 5) aside from knowledge is the  
354 awareness of the presence of a typhoid patient at home<sup>118</sup>. Individuals who are unsure of the  
355 presence of another/previous typhoid patient at home are more likely to have typhoid or a  
356 recurrence than those with full awareness. Typhoid patients may continue to shed *S. Typhi* in  
357 their stool and urine after initial antimicrobial treatment and up to 10% may do so for up to 3  
358 months while others proceed to become asymptomatic carriers<sup>1</sup>. These transient or chronic  
359 carriers can be a source of reinfection<sup>133,134</sup> or reactivation of previous infections<sup>135</sup> at home  
360 and household members well informed of their presence may gain more knowledge about the  
361 disease, how it is transmitted, and how to avoid infection by the pathogen.

362 Recent contact with typhoid patients has also been observed as a risk factor in the Mekong  
363 Delta, southern Vietnam<sup>46,86</sup>. Traditional visits to sick persons might increase contact between  
364 individuals in the community. Close contacts who have visited a typhoid case are likely to live  
365 in the same area. Therefore, they might use the same water supply, i.e. transmission may still  
366 have occurred via water and not by person-to-person spread. Health education could assess and  
367 address the issue of contact with a sick person.

368 Lastly, overcrowding and housing conditions identified in Table 3 represent another critical  
369 dimension influencing typhoid fever transmission dynamics<sup>29,31,102</sup>. Overcrowding and poor  
370 housing infrastructure, particularly prevalent in squatter settlements, create environments  
371 conducive to person-to-person spread<sup>26</sup>. Inadequate access to sanitation facilities<sup>13,111</sup> further  
372 exacerbates transmission risks, perpetuating cycles of infection within vulnerable populations.

### 373 **Hygiene and Sanitation risk factors**

374 The risk factors outlined in Table 4 underscore the significant impact of hygiene and sanitation  
375 on the spread of typhoid fever. Poor handwashing practices emerge as a notable risk factor,  
376 given the crucial role hands play in transmitting *S. Typhi* through the oral-fecal cycle<sup>23,28,118,121</sup>.  
377 While handwashing with soap and clean water effectively removes pathogens<sup>27</sup>, inadequacies

378 in technique, such as rinsing without soap<sup>51,120</sup> or neglecting handwashing after defecation<sup>11,95</sup>,  
379 can increase the risk of bacterial spread<sup>104</sup>. Furthermore, using medicated soaps is an added  
380 advantage since it is more effective in eliminating bacteria from hands compared to regular  
381 soaps<sup>26</sup>.

382 **Table 4. Hygiene and Sanitation risk factors for typhoid fever susceptibility**

| Common factors                 | Specific risk factors                                                                                                                                                                                                                                                                                                                                                                                                                                                                                                                                                                                                                                                                                                                              |
|--------------------------------|----------------------------------------------------------------------------------------------------------------------------------------------------------------------------------------------------------------------------------------------------------------------------------------------------------------------------------------------------------------------------------------------------------------------------------------------------------------------------------------------------------------------------------------------------------------------------------------------------------------------------------------------------------------------------------------------------------------------------------------------------|
| Hygiene and Behavioral factors | Scarcity of soap near a hand washing facility <sup>26</sup> , non-use of soap for handwashing <sup>11,47,67,106</sup> , non-use of medicated soap <sup>26</sup> , non-availability of soap to wash hands after toilet use <sup>66,102</sup> , a habit of not washing hands before cooking/after defecating <sup>51</sup> , infrequent hand washing after latrine use <sup>11,95</sup> , poor hand washing practices <sup>103</sup> , occasionally/never washing hand with water and soap <sup>23,120</sup> , never/rarely washing hands before preparing/handling food, eating or feeding <sup>27,28,118</sup>                                                                                                                                     |
| WASH practices                 | Poor WASH practices <sup>72</sup> , not living in a better WASH household <sup>73,104</sup>                                                                                                                                                                                                                                                                                                                                                                                                                                                                                                                                                                                                                                                        |
| Sanitation and sewage systems  | Use of pit latrine <sup>25,90</sup> , open defecation <sup>90</sup> , improper disposal of solid waste <sup>25</sup> , burst sewer pipes at home <sup>94</sup> , living in houses with open sewers <sup>27</sup> , visible urine or faeces <sup>51</sup> , poor sanitary practice <sup>13,61,93,96,111</sup> , having home latrines <sup>36</sup> , no toilets at/in the residence <sup>106,113</sup> , poor excreta disposal <sup>77</sup> , having unimproved or malfunctioning sanitation infrastructure <sup>11</sup> , unsterilized water from the hospital disposal and residential sewage used to irrigate vegetable farmlands <sup>108</sup> , inadequate public sewerage system <sup>88</sup> , poor toilet drainage soil <sup>77</sup> . |

383  
384 As mentioned earlier, typhoid fever is an oral route disease, and poor sanitation can trigger the  
385 disease<sup>94</sup>. The condition of the sewerage system has an important impact on typhoid fever  
386 incidence. Unimproved or damaged sanitation facilities and improper solid waste disposal are  
387 major sources of *S. Typhi*. According to Prasad et al.<sup>11</sup>, people lacking access to improved  
388 sanitation facilities or with damaged improved sewerage systems are particularly vulnerable.  
389 Moreover, household toilets built by persons without expertise are poorly constructed, situated  
390 in permeable soil, and prone to flooding and leaks, potentially leading to pollution of surface  
391 water and crops by human faeces<sup>77</sup>. Strengthening the installation of sanitary excreta facilities,  
392 along with proper waste disposal measures, is essential for more efficiently preventing typhoid  
393 fever. There is a direct correlation between improper solid waste disposal and the prevalence  
394 of typhoid fever<sup>25</sup>. Where sanitation and garbage disposal are lacking, typhoid fever continues

395 to threaten life. Improper disposal of excreta within residential areas is associated with the risk  
396 of typhoid fever<sup>77</sup>. Preventing excreta from entering the domestic arena has a greater impact  
397 on typhoid transmission than behaviours preventing pathogens in the environment from being  
398 ingested (e.g. hand washing).

399 Furthermore, pit latrines, open defecation or sewer, burst sewer pipes at home and visible urine  
400 or faeces, have all been identified as risk factors for typhoid fever in several studies<sup>27,51,90,94</sup>.

401 Finally, the discharge of unsterilized water from hospital and residential sewage into rainwater  
402 canal systems used to irrigate farmlands where vegetables are cultivated leads to contamination  
403 of the produce<sup>108</sup>. These contaminated vegetables are often consumed without thorough  
404 washing, contributing to an increased incidence of typhoid fever. Particularly during the rainy  
405 season, when irrigation with more polluted water is common, the spread of pollution from  
406 farmlands, mixed with garbage, poses a heightened risk to human-inhabited areas.

## 407 **Other risk factors for typhoid fever**

408 Table 5 presents other typhoid risk factors of antimicrobial agents, host factors, vaccination,  
409 travel-related risk, and environmental and climate conditions. Antimicrobial exposure has the  
410 greatest impact on *S. Typhi* infection. Prior use of antimicrobials at disease onset connects with  
411 an increased risk of typhoid infection, particularly concerning both multiple (MDR) and  
412 extensively (XDR) drug-resistant strains<sup>61,79</sup>. Likewise, studies indicate a relationship between  
413 frequent or recent antimicrobial use within four weeks preceding illness onset and the  
414 occurrence of typhoid fever<sup>32,42,45,99</sup>. Antimicrobial exposure can induce prolonged alterations  
415 in gut flora and compromise the barrier against bacterial colonization, thereby reducing the  
416 threshold of *S. Typhi* required for infection<sup>45</sup>. Furthermore, we discovered in studies such as  
417 Yousafzai et al.<sup>117</sup>, Srinivasan et al.<sup>101</sup>, and Kamal et al.<sup>79</sup> emphasizing antimicrobial resistance  
418 as a risk factor for typhoid fever with certain resistant strains capable of causing epidemics.  
419 Antimicrobial resistance is caused by the routine presence of *S. Typhi* in the human intestine,

420 and indiscriminate antibiotic usage<sup>42,61</sup>. Consequently, drug-resistant *S. Typhi* strains,  
421 facilitated by the presence of multiple virulence factors, are becoming more frequent  
422 worldwide. Notably, we identified specific risk factors associated with *S. Typhi*-resistant  
423 strains encoding a range of virulence genes, including those within the H58 lineage, capable of  
424 infecting and interacting with host cells<sup>58,60,101,119</sup>.

## 425 **Host risk factors**

426 Host genetic factors influence susceptibility to infectious diseases in humans. Our review  
427 turned up a study by Mustafa et al.<sup>33</sup> that explored the relationship between genetic  
428 polymorphisms and the risk of typhoid fever. The findings suggested that individuals with the  
429 2R3R heterozygote for the intronic VNTR of IL4 may be genetically predisposed to typhoid  
430 fever. However, a study by Dunstan et al.<sup>122</sup> suggested that a haplotype in the TNF locus offers  
431 protection from typhoid. Another study<sup>47</sup>, found a link between serum anti-*H. pylori*  
432 immunoglobulin G (IgG) antibodies and an increased risk of typhoid fever. The presence of  
433 serum IgG antibodies indicates either prior or active infection with *H. pylori*, as antibodies can  
434 persist even after infection clearance, potentially increasing the risk of infections<sup>47,136,137</sup>. A  
435 possible explanation is that the gastric-acid barrier serves as a crucial defense mechanism  
436 against *S. Typhi* infection. *H. pylori* infection has been associated with hypochlorhydria, a  
437 condition that impairs the gastric-acid barrier in the stomach<sup>47,107</sup>. This impairment may be the  
438 mechanism through which *H. pylori* infection increases the risk of typhoid fever.

439 A substantial relationship between typhoid fever and having a chronic underlying condition  
440 disease was also identified in our review<sup>67</sup>. This could be explained by the fact that *S. Typhi*  
441 was not cleared from the body due to the weakening immune system caused by the underlying  
442 chronic diseases. For instance, while *S. Typhi* is not widely associated with AIDS in developed  
443 countries, this relationship is observed in endemic areas. We uncovered a study by Gotuzzo et  
444 al.<sup>69</sup> that found an increased risk of typhoid in HIV-infected patients from typhoid-endemic

445 areas. It is worth mentioning that the majority of the HIV-positive patients enrolled in the study  
446 were homosexuals, suggesting a potential increase in typhoid incidence due to direct faecal-  
447 oral transmission among the homosexual population.

### 448 **Travel-related risk**

449 Typhoid fever, once prevalent in industrialized countries, is now effectively controlled<sup>89,91</sup>, yet  
450 imported infections remain a significant public health concern<sup>37,50,83</sup>. In our study, we identified  
451 the risk of typhoid fever associated with travel, as detailed in Table 5. The risk of infection  
452 among travellers varies depending on factors such as age, destination, duration, and purpose of  
453 travel<sup>97</sup>. Travellers visiting friends or relatives (VFRs) are in a high-risk category for typhoid  
454 fever<sup>37,59,71</sup>. Because they are much less likely than other travellers to seek pre-travel  
455 counselling, they may visit more rural, remote areas and engage closely with local people as  
456 well as eat high-risk foods and beverages<sup>49</sup>. Children and young adolescents who are VFRs are  
457 also at high risk of contracting typhoid fever due to a lack of immunity or the possibility of  
458 travelling under unhygienic conditions<sup>59,80,97</sup>. We also discovered that travelling to endemic  
459 locations increases the risk of contracting typhoid<sup>50,57,84,91</sup>. According to Lin et al.<sup>84</sup>, over half  
460 of all travellers with typhoid returning to developed countries come from Asia or Africa, where  
461 the disease is widespread. This may also reflect increased exposure to these environments.  
462 Moreover, the risk of infection is highest during extended journeys to endemic areas. Short-  
463 term visitors to such areas face lower risk<sup>37</sup>. Economic globalization facilitates the movement  
464 of travellers for business or tourism, contributing to disease spread. Consequently, the influx  
465 of workers and foreign tourists, often without proper disease-preventive education or vaccines,  
466 increases the risk of typhoid infection<sup>80,100</sup>.

### 467 **Vaccination**

468 Vaccination is essential for the control of typhoid fever in endemic and epidemic settings as  
469 well as among travellers moving between non-endemic and endemic areas. The WHO

470 recommends the programmatic use of typhoid fever vaccines in endemic areas<sup>4</sup>. We retrieved  
471 two studies<sup>73,104</sup> where the risk of typhoid fever was reduced among populations who had  
472 received effective typhoid vaccines and lived in households with better water, sanitation, and  
473 hygiene (WASH) conditions, Table 5. Conversely, poor vaccination coverage or the absence  
474 of vaccination with suboptimal WASH can exacerbate typhoid transmission in a given  
475 area<sup>61,101</sup>. Defective vaccine efficacy can result from various factors, including faulty batches,  
476 incorrect immunization procedures, or the interval since vaccination. In our study, we found  
477 evidence of ineffective vaccines increasing the risk of typhoid fever, particularly in individuals  
478 vaccinated more than three years prior<sup>92</sup>. This is due to vaccine waning as polysaccharide  
479 vaccines exhibit a cumulative efficacy of approximately 55% over three years, with significant  
480 protection observed primarily within the first two years post-immunization.

#### 481 **Environmental, seasonal and climate factors**

482 Typhoid fever transmission exhibits distinct seasonal patterns influenced by environmental and  
483 climatic factors such as temperature, humidity, and precipitation. In this study, diverse peak  
484 risk periods have been identified in different endemic regions. While Taiwan registers a surge  
485 in cases during the fall (September-November) and winter seasons (December-February)<sup>84</sup>, in  
486 India, Allahabad experiences its peak in June<sup>22</sup>, with Ahmedabad seeing a spike during the  
487 monsoon season (July-November)<sup>75</sup>. Another study by Corner et al.<sup>54</sup> discovered that almost  
488 half of the yearly typhoid cases, reaching up to 11 per 100,000 individuals in the Dhaka  
489 Metropolitan Area, occurred during summer and fall (July-October). Additionally, Srinivasan  
490 and colleagues<sup>101</sup> found a correlation between hot weather (summer i.e. June-August) and  
491 increased typhoid cases. These fluctuations stem from a complex interplay of climatic  
492 conditions, hygiene practices, and local cultural dynamics of an area<sup>84,138</sup>. For instance, during  
493 summer seasons or in regions with warmer temperatures, *S. Typhi* multiplication in  
494 contaminated foods is enhanced<sup>101</sup>, likewise, during colder temperature and humidity

495 conditions, *S. Typhi* survive longer in water and soil<sup>139</sup>. These changes in climatic conditions  
496 together with increased human movement interact to drive typhoid fever infection in many  
497 endemic areas. Furthermore, heavy rainfall can trigger flooding, leading to the contamination  
498 of water sources through sewage overflow<sup>22,64</sup> exacerbating typhoid incidences. Similarly,  
499 increased precipitation associated with the rainy season may facilitate the spread of *S. Typhi*  
500 through water and food contamination<sup>75</sup>. In areas where surface water is relied upon for daily  
501 needs, such as low-lying areas, the risk is compounded during the rainy season due to sewage  
502 runoff<sup>40,54,55</sup>. Settlements situated in flood-prone or hydrological terrains, like river floodplains,  
503 face severe typhoid transmission risks, particularly during the rainy season<sup>65,76</sup>.

## 504 **Conclusion**

505 Identifying the risk factors contributing to typhoid fever is crucial for understanding and  
506 controlling its transmission. Effective prevention and control require addressing these factors  
507 by improving water and food quality, enhancing hygiene and sanitation, implementing mass  
508 vaccination programs, and promoting health education. Interventions targeting environmental  
509 and climate-related transmission are also essential for mitigating the risks associated with  
510 typhoid fever.

## 511 **Study limitation**

512 This study is limited to English-language articles.

## 513 **Acknowledgement**

514 Special thanks to the EOD projects at Kwame Nkrumah University of Science in collaboration  
515 with the International Vaccine Institute for their support.

## 516 **References**



- 517 1. Crump JA, Sjölund-Karlsson M, Gordon MA, Parry CM. Epidemiology, clinical  
518 presentation, laboratory diagnosis, antimicrobial resistance, and antimicrobial management  
519 of invasive Salmonella infections. *Clinical microbiology reviews*. 2015;28(4):901-37.
- 520 2. Cunha BA. Osler on typhoid fever: differentiating typhoid from typhus and malaria.  
521 *Infectious Disease Clinics*. 2004;18(1):111-25.
- 522 3. Parry CM, Wijedoru L, Arjyal A, Baker S. The utility of diagnostic tests for enteric fever in  
523 endemic locations. *Expert review of anti-infective therapy*. 2011;9(6):711-25.
- 524 4. WHO. Typhoid vaccines: WHO position paper–March 2018–Vaccins antityphoïdiques: note  
525 de synthèse de l’OMS–mars 2018. *Weekly Epidemiological Record= Relevé*  
526 *épidémiologique hebdomadaire*. 2018;93(13):153-72.
- 527 5. Stuart BM, Pullen RL. Typhoid: clinical analysis of three hundred and sixty cases. *Archives*  
528 *of Internal Medicine*. 1946;78(6):629-61.
- 529 6. Crump JA, Luby SP, Mintz ED. The global burden of typhoid fever. *Bulletin of the World*  
530 *Health Organization*. 2004;82(5):346-53.
- 531 7. Buckle GC, Walker CLF, Black RE. Typhoid fever and paratyphoid fever: Systematic review  
532 to estimate global morbidity and mortality for 2010. *Journal of global health*. 2012;2(1).
- 533 8. Stanaway JD, Reiner RC, Blacker BF, Goldberg EM, Khalil IA, Troeger CE, et al. The global  
534 burden of typhoid and paratyphoid fevers: a systematic analysis for the Global Burden of  
535 Disease Study 2017. *The Lancet Infectious Diseases*. 2019;19(4):369-81.
- 536 9. Marks F, Im J, Park SE, Pak GD, Jeon HJ, Nana LRW, et al. Incidence of typhoid fever in  
537 Burkina Faso, Democratic Republic of the Congo, Ethiopia, Ghana, Madagascar, and Nigeria  
538 (the Severe Typhoid in Africa programme): a population-based study. *The Lancet Global*  
539 *Health*. 2024;12(4):e599-e610.
- 540 10. WHO. Typhoid vaccines: WHO position paper, March 2018–Recommendations. *Vaccine*.  
541 2019;37(2):214-6.

- 542 11. Prasad N, Jenkins AP, Naucukidi L, Rosa V, Sahu-Khan A, Kama M, et al. Epidemiology  
543 and risk factors for typhoid fever in Central Division, Fiji, 2014–2017: a case-control study.  
544 PLoS neglected tropical diseases. 2018;12(6):e0006571.
- 545 12. Zubair OAR, Mohammad MY. Prevalent sources of enteric fevers among women in Mosul  
546 city. Annals of Tropical Medicine and Public Health. 2020;23.
- 547 13. Meftahuddin T. Review of the trends and causes of food borne outbreaks in Malaysia from  
548 1988 to 1997. The Medical Journal of Malaysia. 2002;57(1):70-9.
- 549 14. Lee J-S, Mogasale VV, Mogasale V, Lee K. Geographical distribution of typhoid risk factors  
550 in low and middle income countries. BMC infectious diseases. 2016;16:1-10.
- 551 15. Kim J-H, Choi J, Kim C, Pak GD, Parajulee P, Haselbeck A, et al. Mapping the incidence  
552 rate of typhoid fever in sub-Saharan Africa. PLoS neglected tropical diseases.  
553 2024;18(2):e0011902.
- 554 16. Brockett S, Wolfe MK, Hamot A, Appiah GD, Mintz ED, Lantagne D. Associations among  
555 water, sanitation, and hygiene, and food exposures and typhoid fever in Case–Control studies:  
556 a systematic review and meta-analysis. The American journal of tropical medicine and  
557 hygiene. 2020;103(3):1020.
- 558 17. Mogasale VV, Ramani E, Mogasale V, Park JY, Wierzba TF. Estimating typhoid fever risk  
559 associated with lack of access to safe water: a systematic literature review. Journal of  
560 environmental and public health. 2018;2018.
- 561 18. Ma PY, Tan JE, Hee EW, Yong DWX, Heng YS, Low WX, et al. Human genetic variation  
562 influences enteric fever progression. Cells. 2021;10(2):345.
- 563 19. Levantesi C, Bonadonna L, Briancesco R, Grohmann E, Toze S, Tandoi V. Salmonella in  
564 surface and drinking water: occurrence and water-mediated transmission. Food Research  
565 International. 2012;45(2):587-602.

- 566 20. Ouzzani M, Hammady H, Fedorowicz Z, Elmagarmid A. Rayyan—a web and mobile app for  
567 systematic reviews. *Systematic reviews*. 2016;5:1-10.
- 568 21. Akwa TE, Nguimbous SP. Investigation of typhoid fever and their associated risk factors in  
569 children attending “Deo Gratias” Hospital in Douala, Littoral, Cameroon. *Electronic Journal*  
570 *of Medical and Educational Technologies*. 2021;14(2):em2107.
- 571 22. Alajeely A, Lawrence R, Jeyakumar E, Maurice NG. Risk factors of Typhoid fever amongst  
572 patients in the Allahabad region, India. *International Journal of Current Research*.  
573 2014;6(11):10025-9.
- 574 23. Alba S, Bakker MI, Hatta M, Scheelbeek PF, Dwiyanti R, Usman R, et al. Risk factors of  
575 typhoid infection in the Indonesian archipelago. *PloS one*. 2016;11(6):e0155286.
- 576 24. Anita S, Amir K, Fadzilah K, Ahamad J, Noorhaida U, Marina K, et al. Risk factors for  
577 typhoid outbreak in Sungai Congkak recreational park, Selangor 2009. *Med J Malaysia*.  
578 2012;67(1):12-6.
- 579 25. Eba K, Bekele D. Prevalence of typhoid fever and its risk factors in Lalo Assabi District,  
580 West Wollega, Oromiya, Ethiopia. *Journal of Bacteriology & Parasitology*. 2019;10(1).
- 581 26. Fahad Javaid S, Syed Rizwan H. Risk factors for typhoid fever in children in squatter  
582 settlements of Karachi: a nested case-control study. 2008.
- 583 27. Gasem MH, Dolmans W, Keuter M, Djokomoeljanto R. Poor food hygiene and housing as  
584 risk factors for typhoid fever in Semarang, Indonesia. *Tropical Medicine & International*  
585 *Health*. 2001;6(6):484-90.
- 586 28. Halder S, Rahman ME, Sarker MM, Mone FH, Roy K, Tajkia G. Identification of Risk  
587 Factors for Typhoid Fever in Children Admitted in a Tertiary Care Hospital. 2021.
- 588 29. Hosoglu S, Celen M, Geyik M, Akalin S, Ayaz C, Acemoglu H, et al. Risk factors for typhoid  
589 fever among adult patients in Diyarbakir, Turkey. *Epidemiology & Infection*.  
590 2006;134(3):612-6.

- 591 30. Javed N, Abbasi S, Tahir M, Bashir F. Identifying the Risk Factors for Typhoid Fever among  
592 the Residents of Rural Islamabad. *Pakistan Journal of Medical Research*. 2017;56(2).
- 593 31. Khan MI, Ochiai R, Soofi S, VON-SEIDLEIN L, Khan M, Sahito S, et al. Risk factors  
594 associated with typhoid fever in children aged 2–16 years in Karachi, Pakistan. *Epidemiology  
595 & Infection*. 2012;140(4):665-72.
- 596 32. Luby S, Faizan M, Fisher-Hoch S, Syed A, Mintz E, Bhutta Z, et al. Risk factors for typhoid  
597 fever in an endemic setting, Karachi, Pakistan. *Epidemiology & Infection*. 1998;120(2):129-  
598 38.
- 599 33. Mustafa MAE. Association of VNTR polymorphism in intron3 of IL-4 gene and TNF $\alpha$ -308  
600 SNP and non-genetic risk factors with typhoid fever in Khartoum State, Sudan. 2016.
- 601 34. Rabasa A, Mava Y, Pius S, Timothy S, Baba U. Typhoid fever in children: clinical  
602 presentation and risk factors. *Nigerian Journal of Paediatrics*. 2013;40(1):60-3.
- 603 35. Ram P, Naheed A, Brooks W, Hossain M, Mintz E, Breiman R, et al. Risk factors for typhoid  
604 fever in a slum in Dhaka, Bangladesh. *Epidemiology & Infection*. 2007;135(3):458-65.
- 605 36. Sharma PK, Ramakrishnan R, Hutin Y, Manickam P, Gupte M. Risk factors for typhoid in  
606 Darjeeling, West Bengal, India: evidence for practical action. *Tropical Medicine &  
607 International Health*. 2009;14(6):696-702.
- 608 37. Jelinek T, Nothdurft H-D, von Sonnenburg F, Löscher T. Risk factors for typhoid fever in  
609 travelers. *Journal of Travel Medicine*. 1996;3(4):200-3.
- 610 38. Abera B, Yitayew G, Amare H. Salmonella serotype Typhi, Shigella, and intestinal parasites  
611 among food handlers at Bahir Dar University, Ethiopia. *The Journal of Infection in  
612 Developing Countries*. 2016;10(02):121-6.
- 613 39. Ackers M-L, Puhf ND, Tauxe RV, Mintz ED. Laboratory-based surveillance of Salmonella  
614 serotype Typhi infections in the United States: antimicrobial resistance on the rise. *Jama*.  
615 2000;283(20):2668-73.

- 616 40. Akullian A, Ng'eno E, Matheson AI, Cosmas L, Macharia D, Fields B, et al. Environmental  
617 transmission of typhoid fever in an urban slum. *PLoS neglected tropical diseases*.  
618 2015;9(12):e0004212.
- 619 41. Anand P, Ramakrishnan R. Investigation of the outbreak of typhoid in a village of Thar Desert  
620 Rajasthan, India. *Indian Journal of Medical Research*. 2010;131(6):799-803.
- 621 42. Anderson E, Smith H. Chloramphenicol resistance in the typhoid bacillus. *Br Med J*.  
622 1972;3(5822):329-31.
- 623 43. Batool R, Qureshi S, Yousafzai MT, Kazi M, Ali M, Qamar FN. Risk factors associated with  
624 extensively drug-resistant typhoid in an outbreak setting of Lyari Town Karachi, Pakistan.  
625 *The American journal of tropical medicine and hygiene*. 2022;106(5):1379.
- 626 44. Samaridin A, Akhmedov M. Epidemic Typhoid Fever--Dushanbe, Tajikistan, 1997. *MMWR:*  
627 *Morbidity & Mortality Weekly Report*. 1998;47(36):752-6.
- 628 45. Srikantiah P, Vafokulov S, Luby SP, Ishmail T, Earhart K, Khodjaev Nm, et al. Epidemiology  
629 and risk factors for endemic typhoid fever in Uzbekistan. *Tropical Medicine & International*  
630 *Health*. 2007;12(7):838-47.
- 631 46. Tran H, Bjune G, Nguyen B, Rottingen J, Grais R, Guerin P. Risk factors associated with  
632 typhoid fever in Son La province, northern Vietnam. *Transactions of the Royal Society of*  
633 *Tropical Medicine and Hygiene*. 2005;99(11):819-26.
- 634 47. Bhan MK, Bahl R, Sazawal S, Sinha A, Kumar R, Mahalanabis D, et al. Association between  
635 *Helicobacter pylori* infection and increased risk of typhoid fever. *The Journal of infectious*  
636 *diseases*. 2002;186(12):1857-60.
- 637 48. Birkhead GS, Morse DL, Levine WC, Fudala JK, Kondracki SF, Chang H-G, et al. Typhoid  
638 fever at a resort hotel in New York: a large outbreak with an unusual vehicle. *Journal of*  
639 *Infectious Diseases*. 1993;167(5):1228-32.

- 640 49. Boggild AK, Castelli F, Gautret P, Torresi J, von Sonnenburg F, Barnett ED, et al. Vaccine  
641 preventable diseases in returned international travelers: results from the GeoSentinel  
642 Surveillance Network. *Vaccine*. 2010;28(46):7389-95.
- 643 50. Braddick M, Sharp J. Enteric fever in Scotland 1975–1990. *Public health*. 1993;107(3):193-  
644 8.
- 645 51. Brainard J, D’hondt R, Ali E, Van den Bergh R, De Weggheleire A, Baudot Y, et al. Typhoid  
646 fever outbreak in the Democratic Republic of Congo: Case control and ecological study.  
647 *PLoS neglected tropical diseases*. 2018;12(10):e0006795.
- 648 52. Chao D, Park J, Marks F, Ochiai R, Longini I, Halloran M. The contribution of neighbours  
649 to an individual's risk of typhoid outcome. *Epidemiology & Infection*. 2015;143(16):3520-7.
- 650 53. Clark ST, Cronin K, Corbeil AJ, Patel SN. A ten-year retrospective survey of antimicrobial  
651 susceptibility patterns among *Salmonella enterica* subsp. *enterica* serovar typhi isolates in  
652 Ontario, Canada. *Microbiology Spectrum*. 2023;11(1):e04828-22.
- 653 54. Corner RJ, Dewan AM, Hashizume M. Modelling typhoid risk in Dhaka Metropolitan Area  
654 of Bangladesh: the role of socio-economic and environmental factors. *International journal  
655 of health geographics*. 2013;12:1-15.
- 656 55. de Alwis R, Watson C, Nikolay B, Lowry JH, Thieu NTV, Van TT, et al. Role of  
657 environmental factors in shaping spatial distribution of *Salmonella enterica* serovar Typhi,  
658 Fiji. *Emerging infectious diseases*. 2018;24(2):284.
- 659 56. Deksissa T, Gebremedhin EZ. A cross-sectional study of enteric fever among febrile patients  
660 at Ambo hospital: prevalence, risk factors, comparison of Widal test and stool culture and  
661 antimicrobials susceptibility pattern of isolates. *BMC infectious diseases*. 2019;19:1-12.
- 662 57. Ekdahl K, de Jong B, Andersson Y. Risk of travel-associated typhoid and paratyphoid fevers  
663 in various regions. *Journal of travel medicine*. 2005;12(4):197-204.

- 664 58. Elemfareji OI, Thong KL. Comparative Virulotyping of Salmonella typhi and Salmonella  
665 enteritidis. Indian journal of microbiology. 2013;53:410-7.
- 666 59. Farmakiotis D, Varughese J, Sue P, Andrews P, Brimmage M, Dobroszycki J, et al. Typhoid  
667 fever in an inner city hospital: A 5-year retrospective review. Journal of travel medicine.  
668 2013;20(1):17-21.
- 669 60. Feasey NA, Masesa C, Jassi C, Faragher EB, Mallewa J, Mallewa M, et al. Three epidemics  
670 of invasive multidrug-resistant Salmonella bloodstream infection in Blantyre, Malawi, 1998–  
671 2014. Clinical Infectious Diseases. 2015;61(suppl\_4):S363-S71.
- 672 61. Fida S, Mansoor H, Saif S, Iqbal J, Khan AQ. Clinical Perspectives of Multiple and  
673 Extensively Drug-Resistant Typhoid; result from a tertiary care hospital from Pakistan. The  
674 Journal of Infection in Developing Countries. 2021;15(04):530-7.
- 675 62. Forster DP, Leder K. Typhoid fever in travellers: estimating the risk of acquisition by country.  
676 Journal of Travel Medicine. 2021;28(8):taab150.
- 677 63. Forsyth J, Bennett NM, Hogben S, Hutchinson E, Rouch G, Tan A, et al. The year of the  
678 Salmonella seekers—1977. Australian and New Zealand journal of public health.  
679 2003;27(4):385-9.
- 680 64. Gao Q, Liu Z, Xiang J, Zhang Y, Tong MX, Wang S, et al. Impact of temperature and rainfall  
681 on typhoid/paratyphoid fever in Taizhou, China: effect estimation and vulnerable group  
682 identification. The American Journal of Tropical Medicine and Hygiene. 2022;106(2):532.
- 683 65. Gauld JS, Olgemoeller F, Heinz E, Nkhata R, Bilima S, Wailan AM, et al. Spatial and  
684 genomic data to characterize endemic typhoid transmission. Clinical Infectious Diseases.  
685 2022;74(11):1993-2000.
- 686 66. Gauld JS, Olgemoeller F, Nkhata R, Li C, Chirambo A, Morse T, et al. Domestic river water  
687 use and risk of typhoid fever: results from a case-control study in Blantyre, Malawi. Clinical  
688 Infectious Diseases. 2020;70(7):1278-84.

- 689 67. Geteneh A, Tadesse S, Biset S, Girma L, Fissiha P. Rapid stool antigenic test for typhoid  
690 fever among suspected cases, Northeast, Ethiopia. *Scientific Reports*. 2023;13(1):649.
- 691 68. Giri S, Mohan VR, Srinivasan M, Kumar N, Kumar V, Dhanapal P, et al. Case-control study  
692 of household and environmental transmission of typhoid fever in India. *The Journal of*  
693 *infectious diseases*. 2021;224(Supplement\_5):S584-S92.
- 694 69. Gotuzzo E, Frisancho O, Sanchez J, Liendo G, Carrillo C, Black RE, et al. Association  
695 between the acquired immunodeficiency syndrome and infection with *Salmonella typhi* or  
696 *Salmonella paratyphi* in an endemic typhoid area. *Archives of Internal Medicine*.  
697 1991;151(2):381-2.
- 698 70. Grist N, Emslie J. Infections in British clinical laboratories, 1988-1989. *Journal of clinical*  
699 *pathology*. 1991;44(8):667-9.
- 700 71. Gunaratnam P, Tobin S, Seale H, McAnulty JM. Infectious diseases in returned travellers,  
701 NSW, 2010–2011. *New South Wales Public Health Bulletin*. 2014;24(4):171-5.
- 702 72. Im J, Islam MT, Ahmmed F, Kim DR, Islam Khan A, Zaman K, et al. Can existing  
703 improvements of water, sanitation, and hygiene (WASH) in urban slums reduce the burden  
704 of typhoid fever in these settings? *Clinical Infectious Diseases*. 2021;72(11):e720-e6.
- 705 73. Im J, Khanam F, Ahmmed F, Kim DR, Kang S, Tadesse BT, et al. Prevention of Typhoid  
706 Fever by Existing Improvements in Household Water, Sanitation, and Hygiene, and the Use  
707 of the Vi Polysaccharide Typhoid Vaccine in Poor Urban Slums: Results from a Cluster-  
708 Randomized Trial. *The American Journal of Tropical Medicine and Hygiene*.  
709 2022;106(4):1149.
- 710 74. Issack MI. Epidemiology of typhoid fever in Mauritius. *Journal of travel medicine*.  
711 2005;12(5):270-4.



- 712 75. Iyer V, Sharma A, Nair D, Solanki B, Umrigar P, Murtugudde R, et al. Role of extreme  
713 weather events and El Niño Southern oscillation on incidence of enteric fever in Ahmedabad  
714 and Surat, Gujarat, India. *Environmental research*. 2021;196:110417.
- 715 76. Jenkins AP, Jupiter S, Mueller U, Jenney A, Vosaki G, Rosa V, et al. Health at the sub-  
716 catchment scale: typhoid and its environmental determinants in Central Division, Fiji.  
717 *EcoHealth*. 2016;13:633-51.
- 718 77. Jenkins AP, Jupiter SD, Jenney A, Rosa V, Naucukidi A, Prasad N, et al. Environmental  
719 foundations of typhoid fever in the Fijian residential setting. *International Journal of*  
720 *Environmental Research and Public Health*. 2019;16(13):2407.
- 721 78. Kabwama SN, Bulage L, Nsubuga F, Pande G, Oguttu DW, Mafigiri R, et al. A large and  
722 persistent outbreak of typhoid fever caused by consuming contaminated water and street-  
723 vended beverages: Kampala, Uganda, January–June 2015. *BMC Public Health*. 2017;17:1-9.
- 724 79. Kamal R, Ching C, Zaman MH, Sultan F, Abbas S, Khan E, et al. Identification of multiple  
725 variant extensively drug-resistant typhoid infections across Pakistan. *The American Journal*  
726 *of Tropical Medicine and Hygiene*. 2023;108(2):278-84.
- 727 80. Karkey A, Arjyal A, Anders KL, Boni MF, Dongol S, Koirala S, et al. The burden and  
728 characteristics of enteric fever at a healthcare facility in a densely populated area of  
729 Kathmandu. *PloS one*. 2010;5(11):e13988.
- 730 81. Karkey A, Thompson CN, Tran Vu Thieu N, Dongol S, Le Thi Phuong T, Voong Vinh P, et  
731 al. Differential epidemiology of *Salmonella* Typhi and Paratyphi A in Kathmandu, Nepal: a  
732 matched case control investigation in a highly endemic enteric fever setting. *PLoS neglected*  
733 *tropical diseases*. 2013;7(8):e2391.
- 734 82. Katz DJ, Cruz MA, Trepka MJ, Suarez JA, Fiorella PD, Hammond RM. An outbreak of  
735 typhoid fever in Florida associated with an imported frozen fruit. *The Journal of infectious*  
736 *diseases*. 2002;186(2):234-9.

- 737 83. Keller A, Frey M, Schmid H, Steffen R, Walker T, Schlagenhauf P. Imported typhoid fever  
738 in Switzerland, 1993 to 2004. *Journal of travel medicine*. 2008;15(4):248-51.
- 739 84. Lin F-H, Chen B-C, Chou Y-C, Hsieh C-J, Yu C-P, editors. Incidence and risk factors for  
740 notifiable typhoid and paratyphoid in Taiwan during the period 2011–2020. *Healthcare*; 2021:  
741 MDPI.
- 742 85. Liu Z, Lao J, Zhang Y, Liu Y, Zhang J, Wang H, et al. Association between floods and  
743 typhoid fever in Yongzhou, China: effects and vulnerable groups. *Environmental research*.  
744 2018;167:718-24.
- 745 86. Luxemburger C, Duc CM, Lanh MN, Wain J, Hien TT, Simpson JA, et al. Risk factors for  
746 typhoid fever in the Mekong delta, southern Viet Nam: a case-control study. *Transactions of*  
747 *the Royal Society of Tropical Medicine and Hygiene*. 2001;95(1):19-23.
- 748 87. Makungo UB, Ramutshila TE, Mabotja MC, Thomas J, Lekalakala-Mokaba R, Smith AM,  
749 et al. Epidemiological investigation of a typhoid fever outbreak in Sekhukhune District,  
750 Limpopo province, South Africa–2017. *Southern African Journal of Infectious Diseases*.  
751 2020;35(1).
- 752 88. Masinaei M, Eshrati B, Yaseri M. Spatial and spatiotemporal patterns of typhoid fever and  
753 investigation of their relationship with potential risk factors in Iran, 2012–2017. *International*  
754 *journal of hygiene and environmental health*. 2020;224:113432.
- 755 89. Mathieu JJ, Henning KJ, Bell E, Frieden TR. Typhoid fever in New York city, 1980 through  
756 1990. *Archives of internal medicine*. 1994;154(15):1713-8.
- 757 90. Mbae C, Mwangi M, Gitau N, Irungu T, Muendo F, Wakio Z, et al. Factors associated with  
758 occurrence of salmonellosis among children living in Mukuru slum, an urban informal  
759 settlement in Kenya. *BMC Infectious Diseases*. 2020;20:1-12.

- 760 91. Mermin JH, Townes JM, Gerber M, Dolan N, Mintz ED, Tauxe RV. Typhoid fever in the  
761 United States, 1985-1994: changing risks of international travel and increasing antimicrobial  
762 resistance. *Archives of Internal Medicine*. 1998;158(6):633-8.
- 763 92. Michel R, Garnotel E, Spiegel A, Morillon M, Saliou P, Boutin J-P. Outbreak of typhoid  
764 fever in vaccinated members of the French Armed Forces in the Ivory Coast. *European journal  
765 of epidemiology*. 2005;20:635-42.
- 766 93. Mohan VR, Srinivasan M, Sinha B, Shrivastava A, Kanungo S, Natarajan Sindhu K, et al.  
767 Geographically weighted regression modeling of spatial clustering and determinants of focal  
768 typhoid fever incidence. *The Journal of Infectious Diseases*. 2021;224(Supplement\_5):S601-  
769 S11.
- 770 94. Muti M, Gombe N, Tshimanga M, Takundwa L, Bangure D, Mungofa S, et al. Typhoid  
771 outbreak investigation in Dzivaresekwa, suburb of Harare City, Zimbabwe, 2011. *Pan  
772 African Medical Journal*. 2014;18(1).
- 773 95. Nyamusore J, Nahimana MR, Ngoc CT, Olu O, Isiaka A, Ndahindwa V, et al. Risk factors  
774 for transmission of *Salmonella Typhi* in Mahama refugee camp, Rwanda: a matched case-  
775 control study. *Pan African Medical Journal*. 2018;29(1):1-13.
- 776 96. Okpasuo OJ, Aguzie IO, Joy AT, Okafor FC. Risk assessment of waterborne infections in  
777 Enugu State, Nigeria: Implications of household water choices, knowledge, and practices.  
778 *AIMS Public Health*. 2020;7(3):634.
- 779 97. Pommelet V, Mariani P, Basmaci R, Tourdjman M, Morin L, Gaschignard J, et al. Enteric  
780 fever among children: 50 cases in a French tertiary care centre. *Journal of travel medicine*.  
781 2018;25(1):tay059.
- 782 98. Pradier C, Keita-Perse O, Bernard E, Gisbert C, Vezolles M, Armengaud A, et al. Outbreak  
783 of typhoid fever on the French Riviera. *European Journal of Clinical Microbiology and  
784 Infectious Diseases*. 2000;19:464-7.

- 785 99. Qamar FN, Yousafzai MT, Khalid M, Kazi AM, Lohana H, Karim S, et al. Outbreak  
786 investigation of ceftriaxone-resistant *Salmonella enterica* serotype Typhi and its risk factors  
787 among the general population in Hyderabad, Pakistan: a matched case-control study. *The*  
788 *Lancet Infectious Diseases*. 2018;18(12):1368-76.
- 789 100. Ren X, Zhang S, Luo P, Zhao J, Kuang W, Ni H, et al. Spatial heterogeneity of socio-  
790 economic determinants of typhoid/paratyphoid fever in one province in central China from  
791 2015 to 2019. *BMC Public Health*. 2023;23(1):927.
- 792 101. Srinivasan M, Sindhu KN, Kumar JS, Ramasamy RK, Pragasam AK, Aasaithampi P, et al.  
793 Outbreak of typhoid fever in children of urban Vellore: a report from the surveillance for  
794 enteric fever in India cohort. *The American Journal of Tropical Medicine and Hygiene*.  
795 2022;107(1):82.
- 796 102. Sur D, Ali M, Von Seidlein L, Manna B, Deen JL, Acosta CJ, et al. Comparisons of predictors  
797 for typhoid and paratyphoid fever in Kolkata, India. *BMC public health*. 2007;7:1-10.
- 798 103. Sutiono AB, Qiantori A, Suwa H, Ohta T. Characteristics and risk factors for typhoid fever  
799 after the tsunami, earthquake and under normal conditions in Indonesia. *BMC Research*  
800 *Notes*. 2010;3:1-9.
- 801 104. Tadesse BT, Khanam F, Ahmmed F, Im J, Islam MT, Kim DR, et al. Prevention of typhoid  
802 by Vi conjugate vaccine and achievable improvements in household water, sanitation, and  
803 hygiene: evidence from a cluster-randomized trial in Dhaka, Bangladesh. *Clinical Infectious*  
804 *Diseases*. 2022;75(10):1681-7.
- 805 105. Vighio A, Syed MA, Hussain I, Zia SM, Fatima M, Masood N, et al. Risk factors of  
806 extensively drug resistant typhoid fever among children in Karachi: case-control study. *JMIR*  
807 *Public Health and Surveillance*. 2021;7(5):e27276.

- 808 106. Vollaard A, Ali S, Van Asten H, Ismid IS, Widjaja S, Visser L, et al. Risk factors for  
809 transmission of foodborne illness in restaurants and street vendors in Jakarta, Indonesia.  
810 *Epidemiology & Infection*. 2004;132(5):863-72.
- 811 107. Vollaard AM, Verspaget HW, Ali S, Visser LG, Veenendaal RA, van Asten HA, et al.  
812 *Helicobacter pylori* infection and typhoid fever in Jakarta, Indonesia. *Epidemiology &*  
813 *Infection*. 2006;134(1):163-70.
- 814 108. Wang J-F, Wang Y, Zhang J, Christakos G, Sun J-L, Liu X, et al. Spatiotemporal  
815 transmission and determinants of typhoid and paratyphoid fever in Hongta District, Yunnan  
816 Province, China. *PLoS neglected tropical diseases*. 2013;7(3):e2112.
- 817 109. Wang L-x, Li X-J, Fang L-Q, Wang D-C, Cao W-C, Biao K. Association between the  
818 incidence of typhoid and paratyphoid fever and meteorological variables in Guizhou, China.  
819 *Chinese medical journal*. 2012;125(3):455-60.
- 820 110. Afifi S, Earhart K, Azab MA, Youssef FG, El Sakka H, Wasfy M, et al. Hospital-based  
821 surveillance for acute febrile illness in Egypt: a focus on community-acquired bloodstream  
822 infections. *American journal of tropical medicine and hygiene*. 2005;73(2):392-9.
- 823 111. Bendib A, Dridi H, Kalla M, Baziz N. Spatial analysis of typhoid fever vulnerability in the  
824 city of Batna (eastern Algeria). *Environnement, Risques & Santé*. 2016;15(3):228-37.
- 825 112. Côté TR, Convery H, Robinson D, Ries A, Barrett T, Frank L, et al. Typhoid fever in the  
826 park: epidemiology of an outbreak at a cultural interface. *Journal of Community Health*.  
827 1995;20:451-8.
- 828 113. Kelly-Hope LA, Alonso WJ, Thiem VD, Anh DD, Canh DG, Lee H, et al. Geographical  
829 distribution and risk factors associated with enteric diseases in Vietnam. *American Journal of*  
830 *Tropical Medicine and Hygiene*. 2007;76(4):706-12.
- 831 114. Khatami A, Khan F, Macartney KK. Enteric fever in children in western Sydney, Australia,  
832 2003–2015. *The Pediatric infectious disease journal*. 2017;36(12):1124-8.

- 833 115.Salama RI, Emara MH, Mostafa HM, Abd-Elsalam S, Alnabawy SM, Elshweikh SA, et al.  
834 Helicobacter pylori infection and risk of salmonella infection. *Medicine*. 2019;98(6):e14335.
- 835 116.Stroffolini T, Manzillo G, De Sena R, Manzillo E, Pagliano P, Zaccarelli M, et al. Typhoid  
836 fever in the Neapolitan area: a case-control study. *European journal of epidemiology*.  
837 1992;8:539-42.
- 838 117.Yousafzai MT, Qamar FN, Shakoor S, Saleem K, Lohana H, Karim S, et al. Ceftriaxone-  
839 resistant Salmonella Typhi outbreak in Hyderabad City of Sindh, Pakistan: high time for the  
840 introduction of typhoid conjugate vaccine. *Clinical Infectious Diseases*.  
841 2019;68(Supplement\_1):S16-S21.
- 842 118.Tawfiq UA, Shohaimi S, Nordin SA, Nadzir MNHM, Ab Rahman AH, Salari N.  
843 Epidemiology and Risk Factors for Typhoid Fever in Gombe Metropolis, Gombe State,  
844 Nigeria. *Malaysian Journal of Public Health Medicine*. 2022;22(2):110-21.
- 845 119.Titus I, Iliyasu M, Sahal M, Umar R, Wali M, Ismai S, et al. Phenotypic Characterization of  
846 Virulence Factors in Multidrug-Resistant Salmonella typhi Serovars Isolated from Clinical  
847 Specimens in Bauchi Metropolis. 2023.
- 848 120.Velema JP, Van Wijnen G, Bult P, Van Naerssen T, Jota S. Typhoid fever in Ujung Pandang,  
849 Indonesia—high-risk groups and high-risk behaviours. *Tropical Medicine & International*  
850 *Health*. 1997;2(11):1088-94.
- 851 121.Vollaard AM, Ali S, Van Asten HA, Widjaja S, Visser LG, Surjadi C, et al. Risk factors for  
852 typhoid and paratyphoid fever in Jakarta, Indonesia. *Jama*. 2004;291(21):2607-15.
- 853 122.Dunstan SJ, Hue NT, Rockett K, Forton J, Morris AP, Diakite M, et al. A TNF region  
854 haplotype offers protection from typhoid fever in Vietnamese patients. *Human genetics*.  
855 2007;122:51-61.

- 856 123. Steinberg E, Bishop R, Haber P, Dempsey A, Hoekstra R, Nelson J, et al. Typhoid fever in  
857 travelers: who should be targeted for prevention? *Clinical infectious diseases*.  
858 2004;39(2):186-91.
- 859 124. Antillón M, Warren JL, Crawford FW, Weinberger DM, Kürüm E, Pak GD, et al. The burden  
860 of typhoid fever in low-and middle-income countries: a meta-regression approach. *PLoS*  
861 *neglected tropical diseases*. 2017;11(2):e0005376.
- 862 125. Anonymous. Typhoid in the large cities of the United States in 1919: eighth annual report.  
863 *JAMA*. 1920;74:672-5.
- 864 126. UNICEF. WHO, Progress on Drinking Water and Sanitation. Available at:  
865 <https://reliefwebint/report/world/progress-drinking-water-and-sanitation-2012> Accessed 8  
866 February 2024. 2012.
- 867 127. Ercumen A, Arnold BF, Kumpel E, Burt Z, Ray I, Nelson K, et al. Upgrading a piped water  
868 supply from intermittent to continuous delivery and association with waterborne illness: a  
869 matched cohort study in urban India. *PLoS medicine*. 2015;12(10):e1001892.
- 870 128. Karkey A, Jombart T, Walker AW, Thompson CN, Torres A, Dongol S, et al. The ecological  
871 dynamics of fecal contamination and *Salmonella* Typhi and *Salmonella* Paratyphi A in  
872 municipal Kathmandu drinking water. *PLoS neglected tropical diseases*.  
873 2016;10(1):e0004346.
- 874 129. Feglo P, Frimpong E, Essel-Ahun M. *Salmonellae* carrier status of food vendors in Kumasi,  
875 Ghana. *East African medical journal*. 2004;81(7):358-61.
- 876 130. Parry CM. Epidemiological and clinical aspects of human typhoid fever. *Salmonella*  
877 *infections: Clinical, immunological and molecular aspects*. 2006:1-18.
- 878 131. Rasul F, Sughra K, Mushtaq A, Zeeshan N, Mehmood S, Rashid U. Surveillance report on  
879 typhoid fever epidemiology and risk factor assessment in district Gujrat, Punjab, Pakistan.  
880 *Biomedical Research*. 2017;28(8):1-6.

881 132. Parry CM, Karunanayake L, Coulter JBS, Beeching NJ. Test for quinolone resistance in  
882 typhoid fever. *BMJ*. 2006;333(7561):260.

883 133. Gunn JS, Marshall JM, Baker S, Dongol S, Charles RC, Ryan ET. Salmonella chronic  
884 carriage: epidemiology, diagnosis, and gallbladder persistence. *Trends in microbiology*.  
885 2014;22(11):648-55.

886 134. Gupta V, Kaur M, Datta P, Chander J. Chronic urinary carrier state due to Salmonella Typhi  
887 causing urinary tract infection in an immunocompetent healthy woman. *Tropical Doctor*.  
888 2018;48(3):236-8.

889 135. Amsalu T, Genet C, Adem Siraj Y. Salmonella Typhi and Salmonella Paratyphi prevalence,  
890 antimicrobial susceptibility profile and factors associated with enteric fever infection in Bahir  
891 Dar, Ethiopia. *Scientific Reports*. 2021;11(1):7359.

892 136. Clemens J, Albert MJ, Rao M, Qadri F, Huda S, Kay B, et al. Impact of infection by  
893 *Helicobacter pylori* on the risk and severity of endemic cholera. *Journal of Infectious*  
894 *Diseases*. 1995;171(6):1653-6.

895 137. Passaro DJ, Taylor DN, Meza R, Cabrera L, Gilman RH, Parsonnet J. Acute *Helicobacter*  
896 *pylori* infection is followed by an increase in diarrheal disease among Peruvian children.  
897 *Pediatrics*. 2001;108(5):e87-e.

898 138. Saad NJ, Lynch VD, Antillón M, Yang C, Crump JA, Pitzer VE. Seasonal dynamics of  
899 typhoid and paratyphoid fever. *Scientific reports*. 2018;8(1):6870.

900 139. Butler T, Mahmoud A, Warren K. Algorithms in the diagnosis and management of exotic  
901 diseases. XXIII. Typhoid fever. *The Journal of Infectious Diseases*. 1977;135(6):1017-20.

## 902 **Author contributions**

903 The study was conceived by EOD and PBO, with PBO leading the development of the review  
904 protocol. EOD, SN, and STA reviewed the protocol before its registration with OSF. PBO  
905 conducted the literature search, screened titles and abstracts, reviewed full texts, and performed



906 data extraction. Any discrepancies were resolved collaboratively by EOD, SN, and STA, who  
907 also reviewed the final dataset. PBO and STA carried out data analyses. All authors contributed  
908 to the manuscript's drafting, reviewing and editing for publication. All authors agreed and  
909 approved the final manuscript for publication.

## 910 **Supporting information**

911 **S1 Table 1.** Summary of study characteristics

912 **S1 Table 2.** Distribution of transmission routes and common risk factors for typhoid

913 **S2.** Data extraction entities to: Risk factors for typhoid fever, a desk review.

## 914 **Competing interest**

915 The authors declared that no competing interests exist.

## 916 **Funding**

917 Authors received no specific funding for this work.
